# Supplementary material
Source: PubMed Central journal article supplement (PMC2140118)

b ions APTA<sup>14</sup> pSQ<sup>12</sup> L<sub>7</sub> Q<sub>8</sub><sup>10</sup> N<sub>9</sub> P<sup>8</sup> P<sub>11</sub><sup>7</sup> P<sub>12</sub><sup>6</sup> P<sup>5</sup> P<sup>3</sup> T<sub>16</sub> TK y ions

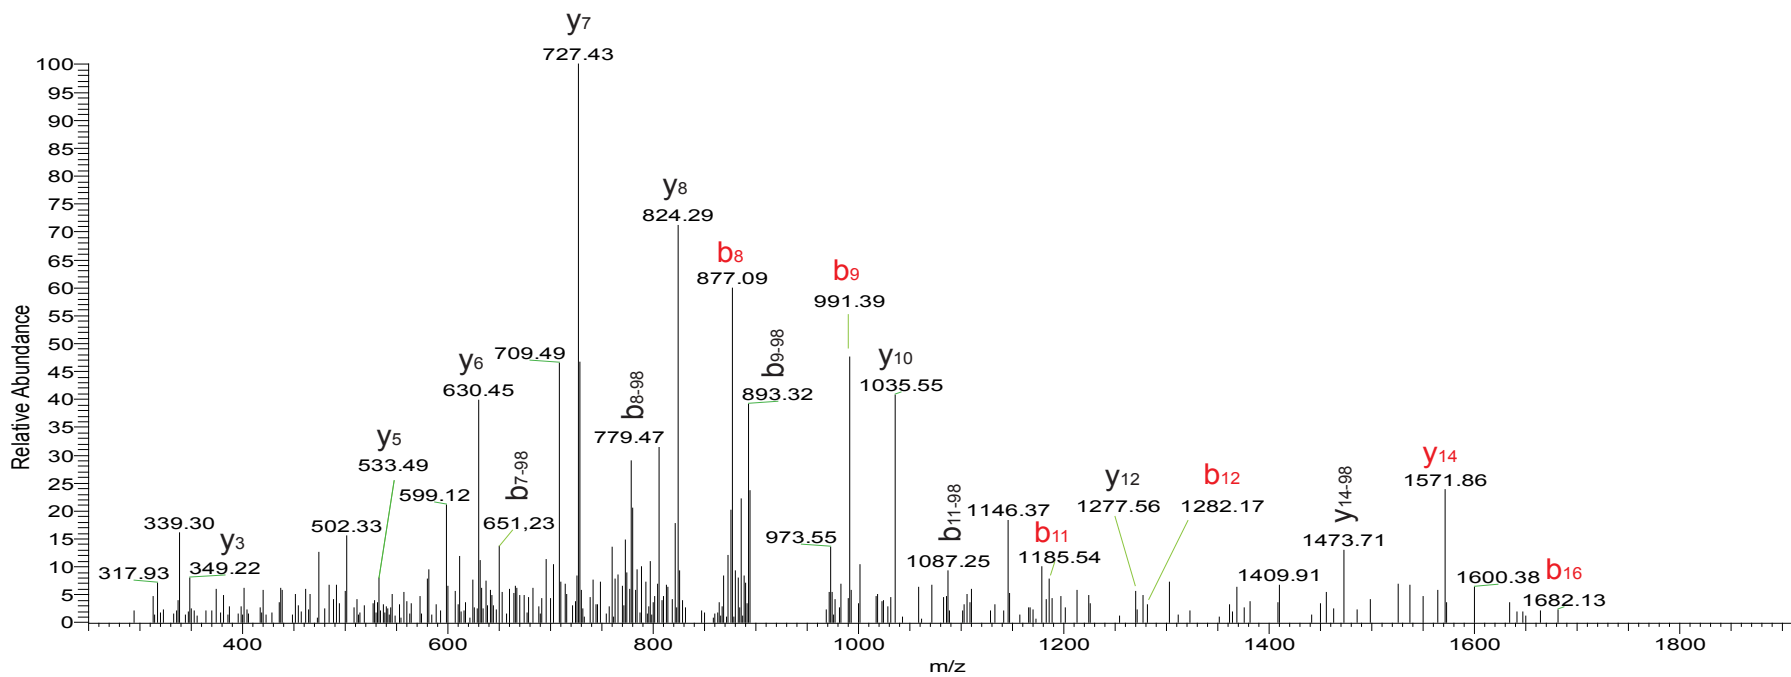

Supplement: 7601933s5.pdf [file 7601933s5.pdf]
