# Supplementary material
Source: PubMed Central journal article supplement (PMC2140118)

b ions  $P^5T_2^4L_3^3pS^2F_5^1K$  y ions

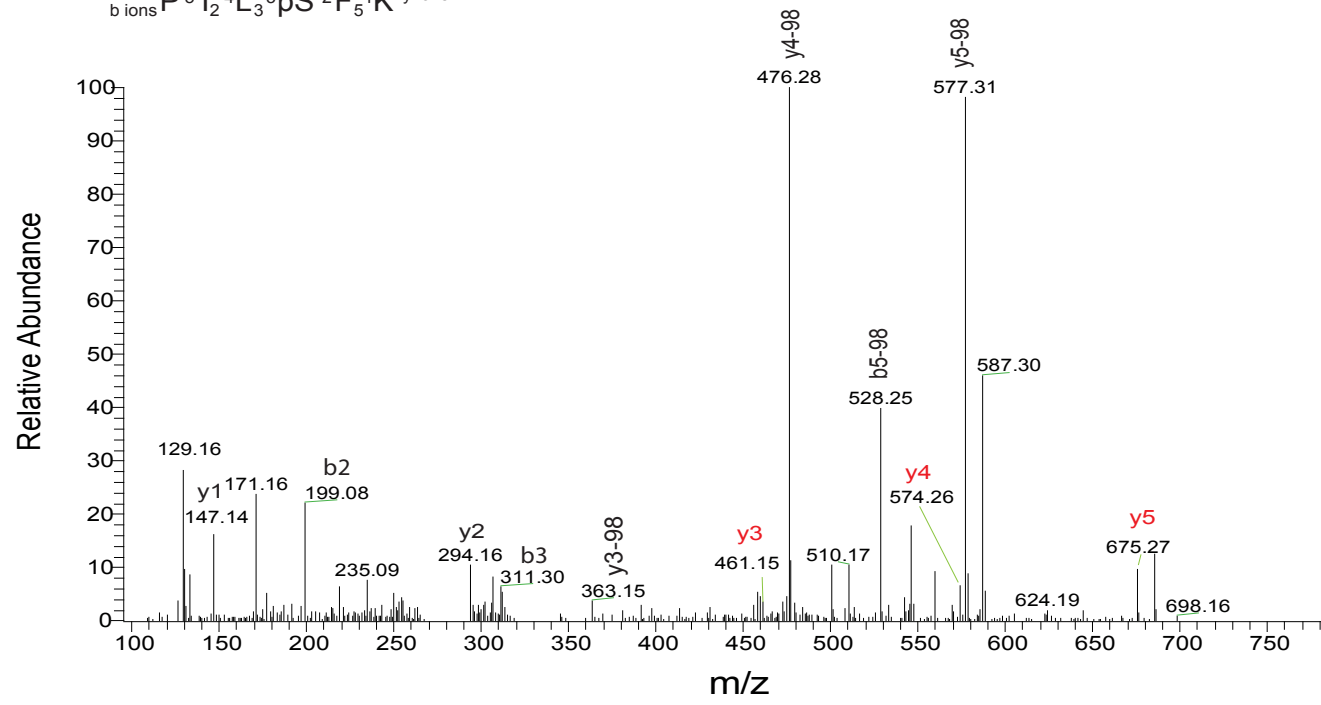

Supplement: 7601933s9.pdf [file 7601933s9.pdf]
